# Supplementary material
Source: PubMed Central journal article supplement (PMC6075697)

# THE LANCET

## Supplementary appendix

This appendix formed part of the original submission and has been peer reviewed. We post it as supplied by the authors.

Supplement to: Stephenson J, Heslehurst N, Hall J, et al. Before the beginning: nutrition and lifestyle in the preconception period and its importance for future health. *Lancet* 2018; published online April 16. [http://dx.doi.org/10.1016/S0140-6736\(18\)30311-8](http://dx.doi.org/10.1016/S0140-6736(18)30311-8).

## **Appendix 1. Literature review on preconception diet and lifestyle risk factors for adverse maternal and perinatal outcomes**

### **Summary of methods**

The literature review aimed to identify original research articles and reviews reporting on relationships between preconception diet and lifestyle risk factors (across the life course) and maternal and perinatal outcomes. The MEDLINE database was searched using the search strategy presented in Box 1 with restrictions to human studies published in English in the past 5 years (from November 2011). The search was performed in November 2016 and updated in February 2017. Results were imported into Endnote for title and abstract screening, and relevant studies reporting on exposures in the pre- or periconception period were summarised based on study design, population, period (before or between pregnancies), exposure(s), outcome(s), and main study findings.

#### **Box 1. Search strategy**

((preconception OR pre-conception OR preconception care OR prepregnancy OR pre-pregnancy OR pre-existing OR planning OR intrauterine OR infancy OR childhood OR early life OR school age OR puberty OR adolescence OR adulthood OR sensitive period OR critical period OR accumulation OR timing OR lifecourse OR life-course OR life course OR maternal OR mother OR paternal OR father)

AND (lifestyle OR body mass index OR weight OR overweight OR obese OR diet OR nutrition OR physical activity OR smoking OR alcohol OR illicit drug)

AND (maternal outcome OR infant outcome OR miscarriage OR stillbirth OR gestational diabetes OR gestational hypertension OR preeclampsia OR metabolic risk factors OR delivery method OR anemia OR intrauterine growth restriction OR preterm birth OR low birth weight OR macrosomia OR birth defects OR child outcome OR postpartum depression OR breastfeeding OR fertility))

## Periconception exposures

| Reference           | Study design                                               | Population              | Period         | Exposure(s)                                      | Outcome(s)                        | Finding(s)                                                                                                                                                  |
|---------------------|------------------------------------------------------------|-------------------------|----------------|--------------------------------------------------|-----------------------------------|-------------------------------------------------------------------------------------------------------------------------------------------------------------|
| Case A, 2015 (1)    | Cross-sectional<br>N = 954<br>USA                          | Teenagers               | Periconception | - Pregnancy planning<br>- Folic acid supplements | na                                | 1/3 <sup>rd</sup> of teenagers had intended pregnancy<br>Younger teenagers were less likely to plan and to take preconception folic acid                    |
| Caspers K, 2014 (2) | Case-control<br>N = 906 cases<br>N = 8,352 controls<br>USA | Reproductive-aged women | Periconception | - Alcohol                                        | Congenital limb deficiencies (LD) | 32% consumed alcohol in periconception period, 12% binge drinking<br>Alcohol consumption was associated with lower odds of LD                               |
| Caspers K, 2013 (3) | Case-control<br>N = 906 cases<br>N = 8,352 controls<br>USA | Reproductive-aged women | Periconception | - Cigarette smoking (active and passive)         | Congenital limb deficiencies (LD) | 21% active smokers<br>18% passive smokers<br>Active and passive smoking increased odds of LD                                                                |
| Chan F, 2015 (4)    | Review                                                     | Reproductive-aged women | Periconception | - Opioid use                                     | Birth defects                     | Prevalence periconceptional opioid use: 2-4%<br>Evidence is inconclusive, and potentially confounded by factors such as SES, stress and alcohol consumption |
| Deng K, 2013 (5)    | Case-control<br>N = 284 cases<br>N = 422 controls<br>China | Reproductive-aged men   | Periconception | - Paternal smoking                               | Congenital heart defects (CHD)    | Paternal smoking increased odds of CHD                                                                                                                      |

| Reference              | Study design                                                 | Population              | Period         | Exposure(s)                                                                                                              | Outcome(s)                                                                                                                         | Finding(s)                                                                                                                                                                                                                         |
|------------------------|--------------------------------------------------------------|-------------------------|----------------|--------------------------------------------------------------------------------------------------------------------------|------------------------------------------------------------------------------------------------------------------------------------|------------------------------------------------------------------------------------------------------------------------------------------------------------------------------------------------------------------------------------|
| Makelarski J, 2013 (6) | Case-control<br>N = 1,223 cases<br>N = 6,807 controls<br>USA | Reproductive-aged women | Periconception | - Alcohol                                                                                                                | Neural tube defects (NTD)                                                                                                          | No association found between periconceptional alcohol consumption and NTD                                                                                                                                                          |
| Zhu Y, 2015 (7)        | Case-control<br>N = 7,076 cases<br>N = 7,972 controls<br>USA | Reproductive-aged women | Periconception | - Alcohol                                                                                                                | Congenital heart defects (CHD)                                                                                                     | No association found between periconceptional alcohol consumption and CHD                                                                                                                                                          |
| Matusiak K, 2014 (8)   | Review                                                       | Reproductive-aged women | Periconception | - Maternal periconceptional weight loss                                                                                  | Maternal and perinatal outcomes                                                                                                    | Weight loss (undernutrition) in the periconception period may improve maternal outcomes (gestational diabetes and pre-eclampsia), but increase risk of adverse consequences for offspring (currently only based on animal studies) |
| Steegers R, 2013 (9)   | Review                                                       | Reproductive-aged women | Periconception | - Age, obesity, liver and renal function, folate and vitamin B12 deficiency, fertility treatment (amongst other factors) | Subfertility, miscarriage, congenital malformations, fetal growth restriction, placental related disorders (such as pre-eclampsia) | All listed exposures were found to be associated with the listed outcomes                                                                                                                                                          |

## Preconception exposures

### Summary of reviews

| Reference         | Study design                              | Population              | Period        | Exposure(s)   | Outcome(s)                                                                           | Finding(s)                                                               |
|-------------------|-------------------------------------------|-------------------------|---------------|---------------|--------------------------------------------------------------------------------------|--------------------------------------------------------------------------|
| Dean S, 2014 (10) | Systematic review (observational studies) | Reproductive-aged women | Preconception | - Underweight | Preterm birth                                                                        | Pooled OR 1.32 (1.22, 1.43)<br>N = 12 studies; I <sup>2</sup> = 50%      |
| Dean S, 2014 (10) | Systematic review (observational studies) | Reproductive-aged women | Preconception | - Underweight | Small-for-gestational-age                                                            | Pooled OR 1.64 (1.22, 2.21)<br>N studies and I <sup>2</sup> not reported |
| Dean S, 2014 (10) | Systematic review (observational studies) | Reproductive-aged women | Preconception | - Underweight | Low birth weight                                                                     | Pooled OR 1.37 (0.46, 4.13)<br>N studies and I <sup>2</sup> not reported |
| Dean S, 2014 (10) | Systematic review (observational studies) | Reproductive-aged women | Preconception | - Underweight | Gestational diabetes, gestational hypertension, macrosomia, congenital birth defects | No effects (no pooled estimates reported)                                |
| Dean S, 2014 (10) | Systematic review (observational studies) | Reproductive-aged women | Preconception | - Overweight  | Pre-eclampsia                                                                        | Pooled OR 2.28 (2.04, 2.55)<br>N = 12 studies; I <sup>2</sup> = 77%      |
| Dean S, 2014 (10) | Systematic review (observational studies) | Reproductive-aged women | Preconception | - Overweight  | Gestational diabetes                                                                 | Pooled OR 1.91 (1.58, 2.32)<br>N studies and I <sup>2</sup> not reported |

| Reference          | Study design                              | Population              | Period         | Exposure(s)                    | Outcome(s)               | Finding(s)                                                               |
|--------------------|-------------------------------------------|-------------------------|----------------|--------------------------------|--------------------------|--------------------------------------------------------------------------|
| Dean S, 2014 (10)  | Systematic review (observational studies) | Reproductive-aged women | Preconception  | - Overweight                   | Caesarean delivery       | Pooled OR 1.42 (1.21, 1.66)<br>N studies and I <sup>2</sup> not reported |
| Dean S, 2014 (10)  | Systematic review (observational studies) | Reproductive-aged women | Preconception  | - Overweight                   | Macrosomia               | Pooled OR 1.63 (1.51, 1.76)<br>N studies and I <sup>2</sup> not reported |
| Dean S, 2014 (10)  | Systematic review (observational studies) | Reproductive-aged women | Preconception  | - Overweight                   | Birth defects            | Pooled OR 1.15 (1.07, 1.24)<br>N studies and I <sup>2</sup> not reported |
| Dean S, 2014 (10)  | Systematic review (observational studies) | Reproductive-aged women | Periconception | - Multivitamin supplementation | Pre-eclampsia            | Pooled OR 0.73 (0.58, 0.92)<br>N = 2 studies; I <sup>2</sup> = 23%       |
| Dean S, 2014 (10)  | Systematic review (observational studies) | Reproductive-aged women | Periconception | - Multivitamin supplementation | Congenital abnormalities | Pooled OR 0.57 (0.34, 0.97)<br>N = 4 studies; I <sup>2</sup> = 57%       |
| Dean S, 2014 (10)  | Systematic review (observational studies) | Reproductive-aged women | Periconception | - Multivitamin supplementation | Neural tube defect       | Pooled OR 0.51 (0.31, 0.82)<br>N = 7 studies; I <sup>2</sup> = 84%       |
| Lassi Z, 2014 (11) | Systematic review (observational studies) | Reproductive-aged women | Periconception | - Caffeine intake              | Spontaneous abortion     | Pooled OR 1.77 (0.83, 3.78)<br>N = 6 studies; I <sup>2</sup> = 96%       |

| Reference           | Study design                              | Population              | Period                              | Exposure(s)                            | Outcome(s)                                                     | Finding(s)                                                                                                                                                                                                |
|---------------------|-------------------------------------------|-------------------------|-------------------------------------|----------------------------------------|----------------------------------------------------------------|-----------------------------------------------------------------------------------------------------------------------------------------------------------------------------------------------------------|
| Lassi Z, 2014 (11)  | Systematic review (observational studies) | Reproductive-aged women | Preconception                       | - Alcohol intake                       | Spontaneous abortion                                           | Pooled OR 1.30 (0.85, 1.97)<br>N = 2 studies; I <sup>2</sup> = 0%                                                                                                                                         |
| Lassi Z, 2014 (11)  | Systematic review (observational studies) | Reproductive-aged women | Periconception                      | - Illicit drug use                     | Neural tube defects                                            | Pooled OR 0.91 (0.77, 1.07)<br>N = 6 studies; I <sup>2</sup> = 43%                                                                                                                                        |
| Poston L, 2016 (12) | Review                                    | Reproductive-aged women | Preconception and antenatal periods | - Maternal obesity                     | Range of maternal, perinatal, delivery and postpartum outcomes | Global overview of maternal obesity rates<br>Studies on associations between maternal obesity and maternal, perinatal, delivery and postpartum outcomes                                                   |
| Hanson M, 2016 (13) | Review                                    | Reproductive-aged women | Preconception and antenatal periods | - Maternal obesity                     | Range of maternal, perinatal, delivery and postpartum outcomes | Discusses the lack of preconception studies evaluating the effect of preconception weight management on maternal and perinatal outcomes                                                                   |
| Temel S, 2014 (14)  | Systematic review                         | Reproductive-aged women | Preconception                       | - Preconception lifestyle intervention | Maternal and infant health                                     | Evidence on preconception risk factors associated with maternal and infant outcomes is large<br>Evidence on effectiveness of preconception intervention is lacking<br>Identified few preconception trials |

| Reference                 | Study design      | Population                                                       | Period                        | Exposure(s)                                  | Outcome(s)                                   | Finding(s)                                                                                                                                                                      |
|---------------------------|-------------------|------------------------------------------------------------------|-------------------------------|----------------------------------------------|----------------------------------------------|---------------------------------------------------------------------------------------------------------------------------------------------------------------------------------|
| Anderson K, 2010 (15)     | Systematic review | Reproductive-aged women who perceived that they may be infertile | Preconception                 | - Lifestyle intervention                     | Fertility                                    | No RCTs were identified                                                                                                                                                         |
| Solmi F, 2014 (16)        | Systematic review | Pregnant women                                                   | Preconception (retrospective) | - History of anorexia nervosa                | Low birth weight                             | Offspring of women with (history of) anorexia nervosa were at increased risk of low birth weight, standardised difference was small (200g)                                      |
| De-Regil, L 2015 (17)     | Systematic review | Pregnant women                                                   | Preconception (retrospective) | - Periconceptional folic acid supplement use | Neural tube and other congenital anomalies   | Folic acid, alone or in combination with vitamins and minerals, prevents neural tube defects, but did not have a clear effect on other birth defects                            |
| Ramakrishnan U, 2012 (18) | Systematic review | Reproductive-aged women (non-pregnant and pregnant)              | Peri-conception               | - Nutritional factors                        | Maternal, neonatal and child health outcomes | Pre- and periconceptional intake of multivitamin supplements reduced risk of low birth weight, small-for-gestational-age and preterm delivery. Quality of evidence rated as low |
| Stang J, 2016 (19)        | Review            | Reproductive-aged women                                          | Preconception                 | - Weight                                     | Maternal, neonatal and child health outcomes | There is no evidence evaluating the impact of intentional preconceptional weight loss on pregnancy outcomes                                                                     |



| Reference             | Study design      | Population              | Period             | Exposure(s)              | Outcome(s)                 | Finding(s)                                                                                                                                                                                                                                                                                  |
|-----------------------|-------------------|-------------------------|--------------------|--------------------------|----------------------------|---------------------------------------------------------------------------------------------------------------------------------------------------------------------------------------------------------------------------------------------------------------------------------------------|
| Harrison C, 2016 (20) | Review            | Reproductive-aged women | Preconception      | - Physical activity      | Preconception risk factors | 55% of young women do not meet physical activity guidelines which may influences fertility, PCOS, weight and mental health, and in turn affect maternal and perinatal health                                                                                                                |
| Tobias D, 2011 (21)   | Systematic review | Reproductive-aged women | Preconception      | - Physical activity      | Gestational diabetes       | Pooled OR 0.45 (0.28, 0.75)<br>N = 7 studies, I <sup>2</sup> = 81%                                                                                                                                                                                                                          |
| Campbell J, 2015 (22) | Systematic review | Reproductive-aged men   | Preconception      | - Obesity                | Fertility                  | Obese men were more likely to experience infertility:<br>Pooled OR 1.66 (1.53, 1.79)<br>N = 5 studies; I <sup>2</sup> = 66%<br>Obese men were more likely to have a live birth from assisted reproductive technology:<br>Pooled OR 0.65 (0.44, 0.97)<br>N = 5 studies; I <sup>2</sup> = 54% |
| Been J, 2014 (23)     | Systematic review | Reproductive-aged women | Reproductive years | - Smoke-free legislation | Perinatal outcomes         | Smoke-free legislation was associated with low birth weight<br>Pooled risk change (95% CI): -10.4% (-18.8, -2.0), N = 4 studies, I <sup>2</sup> = 83%<br>No associations with low birth weight or small-for-gestational-age                                                                 |

| Reference         | Study design      | Population              | Period                                   | Exposure(s)         | Outcome(s)                               | Finding(s)                                                                                                                                                                                                                                                                                                                                                                                                                                                                                                |
|-------------------|-------------------|-------------------------|------------------------------------------|---------------------|------------------------------------------|-----------------------------------------------------------------------------------------------------------------------------------------------------------------------------------------------------------------------------------------------------------------------------------------------------------------------------------------------------------------------------------------------------------------------------------------------------------------------------------------------------------|
| Aune D, 2014 (24) | Systematic review | Reproductive-aged women | Preconception and during early pregnancy | - BMI               | Fetal death, stillbirth and infant death | Increases of 5 BMI units were associated with:<br>Fetal death: pooled RR 1.21 (1.09, 1.35), N = 7 studies, I <sup>2</sup> = 78%<br>Stillbirth: pooled RR 1.24 (1.18, 1.30), N = 18 studies, I <sup>2</sup> = 80%<br>Perinatal death: pooled RR 1.16 (1.00, 1.35), N = 11 studies, I <sup>2</sup> = 94%<br>Neonatal death: pooled RR 1.15 (1.07, 1.23), N = 12 studies, I <sup>2</sup> = 79%<br>Infant death: pooled RR 1.18 (1.09, 1.28), N = 4 studies, I <sup>2</sup> = 79%                             |
| Yi X, 2015 (25)   | Systematic review | Reproductive-aged women | Preconception                            | - Bariatric surgery | Maternal and fetal outcomes              | Compared with obese women who had not undergone bariatric surgery, women who had undergone bariatric surgery were less likely to develop:<br>Gestational diabetes:<br>Pooled OR (95% CI): 0.31 (0.15, 0.65), N = 9 studies, I <sup>2</sup> = 85%<br>Hypertensive disorders:<br>Pooled OR (95% CI): 0.42 (0.23, 0.78), N = 9 studies, I <sup>2</sup> = 83%<br>Macrosomia:<br>Pooled OR (95% CI): 0.40 (0.24, 0.67), N = 6 studies, I <sup>2</sup> = 24%<br>However, they were also more likely to develop: |

| Reference            | Study design      | Population              | Period        | Exposure(s)         | Outcome(s)                  | Finding(s)                                                                                                                                                                                                                                                                                                                                                                                                                                                                                                                      |
|----------------------|-------------------|-------------------------|---------------|---------------------|-----------------------------|---------------------------------------------------------------------------------------------------------------------------------------------------------------------------------------------------------------------------------------------------------------------------------------------------------------------------------------------------------------------------------------------------------------------------------------------------------------------------------------------------------------------------------|
|                      |                   |                         |               |                     |                             | <p>Small-for-gestational-age infant:<br/>Pooled OR (95% CI): 2.16 (1.28, 3.66), N = 5 studies, I<sup>2</sup> = 28%</p> <p>There were no effects on caesarean delivery and preterm birth</p> <p>Sensitivity analyses showed that pregnancy &lt;2 years after surgery was associated with even larger lower risk of hypertensive disorders compared with pregnancy &gt;2 years after surgery</p> <p>Based on current literature, there is no conclusive evidence on the optimal timing for conception after bariatric surgery</p> |
| Galazis N, 2014 (26) | Systematic review | Reproductive-aged women | Preconception | - Bariatric surgery | Maternal and fetal outcomes | <p>Compared with obese women who had not undergone bariatric surgery, women who had undergone bariatric surgery were less likely to develop:</p> <p>Gestational diabetes:<br/>Pooled OR (95% CI): 0.47 (0.40, 0.56), N = 15 studies, I<sup>2</sup> = &gt;50%</p> <p>Pre-eclampsia:<br/>Pooled OR (95% CI): 0.45 (0.25, 0.80), N = 11 studies, I<sup>2</sup> = &gt;50%</p> <p>Macrosomia:<br/>Pooled OR (95% CI): 0.46 (0.34, 0.62), N = 14 studies, I<sup>2</sup> = &gt;50%</p>                                                 |

| Reference        | Study design | Population              | Period        | Exposure(s)         | Outcome(s) | Finding(s)                                                                                                                                                                                                                                                                                                                                                                                                                                                                                                                                                                                                                                                                                                                                                                                                                                                                                                                                              |
|------------------|--------------|-------------------------|---------------|---------------------|------------|---------------------------------------------------------------------------------------------------------------------------------------------------------------------------------------------------------------------------------------------------------------------------------------------------------------------------------------------------------------------------------------------------------------------------------------------------------------------------------------------------------------------------------------------------------------------------------------------------------------------------------------------------------------------------------------------------------------------------------------------------------------------------------------------------------------------------------------------------------------------------------------------------------------------------------------------------------|
|                  |              |                         |               |                     |            | <p>However, they were also more likely to develop:</p> <p>Small-for-gestational-age infant:<br/>Pooled OR (95% CI): 1.93 (1.52, 2.44), N = 11 studies, I<sup>2</sup> = &gt;50%</p> <p>Preterm birth:<br/>Pooled OR (95% CI): 1.31 (1.08, 1.58), N = 12 studies, I<sup>2</sup> = &gt;50%</p> <p>NICU admission:<br/>Pooled OR (95% CI): 1.33 (1.02, 1.72), N = 4 studies, I<sup>2</sup> = &lt;50%</p> <p>Maternal anemia:<br/>Pooled OR (95% CI): 3.41 (1.56, 7.44), N = 4 studies, I<sup>2</sup> = &gt;50%</p> <p>There were no effects of bariatric surgery on caesarean delivery and perinatal mortality</p> <p>Laparoscopic adjustable gastric band reduced odds of pre-eclampsia, gestational diabetes, and did not increase risk of small-for-gestational-age and preterm birth</p> <p>This suggests that restrictive rather than mal-absorptive bariatric surgery (like gastric bypass) should be preferred in young women planning pregnancy</p> |
| Tan O, 2012 (27) | Review       | Reproductive-aged women | Preconception | - Bariatric surgery | Fertility  | Evidence is suggestive of better ovulatory function and spontaneous pregnancy rates in                                                                                                                                                                                                                                                                                                                                                                                                                                                                                                                                                                                                                                                                                                                                                                                                                                                                  |

| Reference | Study design | Population | Period | Exposure(s) | Outcome(s) | Finding(s)                                                                                                                                                   |
|-----------|--------------|------------|--------|-------------|------------|--------------------------------------------------------------------------------------------------------------------------------------------------------------|
|           |              |            |        |             |            | obese women who lost weight after bariatric surgery, however, most are small case-control studies<br>Data on improved IVF success rates is similarly limited |

**Summary of original research studies according to preconception risk factors**

*Diet and lifestyle risk factors*

| Reference            | Study design                                            | Population              | Period                                            | Exposure(s)                   | Outcome(s)                                                                                                                  | Finding(s)                                                                                                                                                                                                                                   |
|----------------------|---------------------------------------------------------|-------------------------|---------------------------------------------------|-------------------------------|-----------------------------------------------------------------------------------------------------------------------------|----------------------------------------------------------------------------------------------------------------------------------------------------------------------------------------------------------------------------------------------|
| Nykjaer C, 2014 (28) | Prospective cohort<br>N = 1,303<br>UK                   | Pregnant women          | Preconception (retrospective)<br>During pregnancy | - Alcohol                     | Birth weight and preterm                                                                                                    | 2/3 of women before pregnancy and >1/2 in the first trimester reported alcohol intakes above the UK guidelines<br>High alcohol consumption increased risk of low birth weight and preterm birth<br>Strongest association for first trimester |
| Eagles J, 2012 (29)  | Case-control<br>N = 130 cases<br>N = 670 controls<br>UK | Reproductive-aged women | Preconception (retrospective)                     | - History of anorexia nervosa | Preterm, birth weight, gestational hypertension, antepartum haemorrhage, caesarean section, intrauterine growth restriction | History of anorexia nervosa increased risk of intrauterine growth restriction and antepartum haemorrhage                                                                                                                                     |

| Reference              | Study design                                   | Population              | Period                        | Exposure(s)                                                           | Outcome(s)                                                                                                                    | Finding(s)                                                                                                                                                                                        |
|------------------------|------------------------------------------------|-------------------------|-------------------------------|-----------------------------------------------------------------------|-------------------------------------------------------------------------------------------------------------------------------|---------------------------------------------------------------------------------------------------------------------------------------------------------------------------------------------------|
| Linna M, 2014 (30)     | Prospective cohort<br>N = 11,285<br>Finland    | Reproductive-aged women | Preconception (retrospective) | - History of anorexia nervosa, bulimia nervosa, binge eating disorder | Gestational diabetes, anemia, gestational hypertension, pre-eclampsia, fetal growth, caesarean section, preterm, birth weight | ~10% had an eating disorder history<br>A history of eating disorders was associated with several pregnancy, obstetric and perinatal complications. Strongest associations with birth outcomes     |
| Micali N, 2014 (31)    | Prospective cohort<br>N = 6,318<br>Netherlands | Pregnant women          | Preconception (retrospective) | - History of anorexia nervosa, bulimia nervosa,                       | Fertility treatment and pregnancy planning                                                                                    | ~9% had an eating disorder history<br>Women with eating disorders were more likely to receive fertility treatment and not have an unplanned pregnancy                                             |
| Pasternak Y, 2012 (32) | Retrospective cohort<br>N = 117,875<br>Israel  | Pregnant women          | Preconception (retrospective) | - History of eating disorder                                          | Pregnancy, obstetric and delivery complications                                                                               | ~0.1% had an eating disorder history<br>History of eating disorder increased risk of low birth weight, preterm delivery and caesarean section                                                     |
| Khodr Z, 2014 (33)     | Cohort<br>N = 6,570<br>USA                     | Pregnant women          | Preconception (retrospective) | - Range of risk factors                                               | Preconceptional folic acid - containing supplement use                                                                        | ~32% took preconceptional folic acid-containing supplements<br>Low education, non-white ethnic group and younger women were less likely to take preconceptional folic acid-containing supplements |

| Reference                       | Study design                             | Population              | Period                                                       | Exposure(s)                 | Outcome(s)                                          | Finding(s)                                                                                                                                                                                           |
|---------------------------------|------------------------------------------|-------------------------|--------------------------------------------------------------|-----------------------------|-----------------------------------------------------|------------------------------------------------------------------------------------------------------------------------------------------------------------------------------------------------------|
| Malek L, 2016 (34)              | Cohort<br>N = 857<br>Australia           | Pregnant women          | Preconception (retrospective)                                | - Range of risk factors     | Periconceptual folic acid and iodine supplement use | 27% and 23% took preconceptional folic acid and iodine supplements, respectively<br>Pregnancy planning was the only significant risk factor                                                          |
| Mannien J, 2014 (35)            | Cohort<br>N = 5,975<br>Netherlands       | Pregnant women          | Preconception (retrospective)                                | - Range of risk factors     | Preconceptional folic acid supplement use           | 55% took preconceptional folic acid supplements<br>Non-Western ethnicity, unemployed and not having a partner were the strongest risk factors for not using preconceptional folic acid supplements   |
| Tort J, 2013 (36)               | Cohort<br>N = 12,646<br>France           | Pregnant women          | Preconception (retrospective)                                | - Range of risk factors     | Preconceptional folic acid supplement use           | ~15% took preconceptional folic acid supplements<br>Younger age, multiparous, single, low education, smoking before pregnancy were risk factors for not using preconceptional folic acid supplements |
| Nurses' Health Study II (37-45) | Prospective cohort<br>N = ~13,000<br>USA | Reproductive-aged women | Pre- and inter-conception (up to 2 years prior to pregnancy) | - Range of dietary patterns | Gestational diabetes                                | A diet rich in fruit, vegetables, legumes, nuts and fish; and low in red and processed meat and discretionary foods, was associated with lower risk of gestational diabetes                          |

| Reference                  | Study design                                  | Population                                   | Period                                                       | Exposure(s)                                           | Outcome(s)                                                   | Finding(s)                                                                                                                                                                                                                                                                                        |
|----------------------------|-----------------------------------------------|----------------------------------------------|--------------------------------------------------------------|-------------------------------------------------------|--------------------------------------------------------------|---------------------------------------------------------------------------------------------------------------------------------------------------------------------------------------------------------------------------------------------------------------------------------------------------|
| Schoenaker D, 2015 (46-48) | Prospective cohort<br>N = ~3,500<br>Australia | Reproductive-aged women                      | Pre- and inter-conception (up to 3 years prior to pregnancy) | - Range of dietary patterns                           | Gestational diabetes and hypertensive disorders of pregnancy | A diet rich in fruit, vegetables, legumes, nuts and fish; and low in red and processed meat and discretionary foods, was associated with lower risk of gestational diabetes and hypertensive disorders of pregnancy                                                                               |
| Mishra G, 2014 (49)        | Prospective cohort<br>N = 5,760<br>Australia  | Reproductive-aged women                      | Pre- and inter-conception                                    | - Food groups                                         | Adherence to Australian Dietary Guidelines                   | Less than 30% of women adhered to Meat and Fruit guidelines, less than 12% adhered to Dairy and Cereal guidelines, less than 2% adhered to guideline for Vegetables                                                                                                                               |
| Grieger J, 2014 (50)       | Retrospective cohort<br>N = 309<br>Australia  | Reproductive-aged women                      | Preconception (retrospective)                                | - Dietary patterns in the 12 months before conception | Fetal growth and preterm delivery                            | A dietary pattern containing protein-rich food sources, fruit, and whole-grains was associated with reduced likelihood for preterm delivery, whereas a dietary pattern mainly consisting of discretionary items was associated with preterm delivery, shorter birth length, and earlier gestation |
| Hatch E, 2012 (51)         | Prospective cohort<br>N = 3,628<br>Denmark    | Reproductive-aged women planning a pregnancy | Preconception                                                | - Caffeinated beverages and soda consumption          | Fertility                                                    | No association found after adjustment for confounders between caffeinated beverages and soda consumption and time to pregnancy                                                                                                                                                                    |



| Reference               | Study design                                 | Population                             | Period                          | Exposure(s)                                  | Outcome(s)                                       | Finding(s)                                                                                                                                                                                                                                                                           |
|-------------------------|----------------------------------------------|----------------------------------------|---------------------------------|----------------------------------------------|--------------------------------------------------|--------------------------------------------------------------------------------------------------------------------------------------------------------------------------------------------------------------------------------------------------------------------------------------|
| Twigt J, 2012 (52)      | Prospective cohort<br>N = 199<br>Netherlands | Reproductive-aged women undergoing IVF | Preconception                   | - Adherence to dietary guidelines            | Ongoing pregnancy                                | Better adherence to dietary guidelines increased the chance of ongoing pregnancy                                                                                                                                                                                                     |
| Xie Y, 2015 (53)        | Cohort<br>N = 833<br>USA                     | Reproductive-aged women                | Preconception                   | - Food intake and physical activity          | Birth weight and gestational age                 | 54% reported eating 2 pieces of fruit or vegetables<br>37% reported 7 or more occasions of physical activity<br>Food intake was not associated with birth outcomes<br>Higher physical activity levels were associated with higher birthweight (lower likelihood of low birth weight) |
| Hauff L, 2014 (54)      | Cohort<br>N = 2,824<br>USA                   | Pregnant and postpartum women          | Preconception (retrospectively) | - Pre-pregnancy BMI and psychosocial factors | Breastfeeding intension, initiation and duration | Obese women had similar breastfeeding intension, but low odds of ever breastfeeding and increased risk of earlier cessation of breastfeeding compared with normal-weight women. Psychosocial factors largely explained these associations                                            |
| Krogsgaard S, 2013 (55) | Cohort<br>N = 2,026<br>Norway                | Reproductive-aged women                | Preconception                   | - Physical activity                          | Birth weight                                     | No associations for leisure time physical activity<br>No exercise reduced risk of macrosomia                                                                                                                                                                                         |

| Reference                | Study design                        | Population                  | Period                | Exposure(s)                                               | Outcome(s)                                                                                 | Finding(s)                                                                                                                                                                                                                                                                                                                                                                                             |
|--------------------------|-------------------------------------|-----------------------------|-----------------------|-----------------------------------------------------------|--------------------------------------------------------------------------------------------|--------------------------------------------------------------------------------------------------------------------------------------------------------------------------------------------------------------------------------------------------------------------------------------------------------------------------------------------------------------------------------------------------------|
| Been J, 2015 (56)        | Cohort<br>N = 10,291,113<br>England | Reproductive-<br>aged women | Reproductive<br>years | - Smoke-free<br>legislation                               | Low birth weight,<br>stillbirth, neonatal<br>mortality, sudden<br>infant death<br>syndrome | Compared with period before<br>July 2007, odds ratios for birth<br>outcomes after July 2007<br>(when smoke-free legislation<br>was introduced) indicate lower<br>likelihood of low birth weight,<br>stillbirth and neonatal<br>mortality, but not sudden<br>infant death syndrome.<br>Magnitude of risk reductions<br>were small (4-8%), but<br>significant number of absolute<br>cases were prevented |
| Cox B, 2013 (57)         | Cohort<br>N = 606,877<br>Belgium    | Reproductive-<br>aged women | Reproductive<br>years | - Smoke-free<br>legislation<br>(stepwise<br>introduction) | Preterm birth                                                                              | Consistent patterns of<br>reductions in preterm birth<br>were observed with stepwise<br>introductions of smoking bans<br>(workplace, restaurants, and<br>bars)                                                                                                                                                                                                                                         |
| McKinnon B, 2015<br>(58) | Cohort<br>N = 470,199<br>Canada     | Reproductive-<br>aged women | Reproductive<br>years | - Smoke-free<br>legislation and<br>education              | Preterm birth,<br>small-for-<br>gestational-age,<br>low birth weight                       | Smoke-free legislation was<br>associated with improved birth<br>outcomes in all categories of<br>maternal education                                                                                                                                                                                                                                                                                    |

| Reference           | Study design                 | Population              | Period                            | Exposure(s)                                      | Outcome(s)                                 | Finding(s)                                                                                                                                                                                                                                                                                                                                                                                                                                                                                                                                                                                               |
|---------------------|------------------------------|-------------------------|-----------------------------------|--------------------------------------------------|--------------------------------------------|----------------------------------------------------------------------------------------------------------------------------------------------------------------------------------------------------------------------------------------------------------------------------------------------------------------------------------------------------------------------------------------------------------------------------------------------------------------------------------------------------------------------------------------------------------------------------------------------------------|
| Suzuki K, 2014 (59) | Cohort<br>N = 2,663<br>Japan | Reproductive-aged women | Preconception and early pregnancy | - Smoking cessation before or in early pregnancy | Birth weight and small-for-gestational-age | Smoking during pregnancy was associated with lower birth weight compared with non-smokers. Smoking cessation before or during early pregnancy was associated with a much smaller difference in low birth weight compared with continued smoking. Smoking during pregnancy was associated with small-for-gestational-age, ex-smokers who quit before or during pregnancy were not at increased risk of small-for-gestational-age. Birth weight and the proportion of small-for-gestational-age infants were similar in non-smoking mothers and mothers who quit smoking before or during early pregnancy. |

Weight-related factors

| Reference           | Study design                                 | Population              | Period                    | Exposure(s)                                                       | Outcome(s)                 | Finding(s)                                                                                                                                                                                                                                                                   |
|---------------------|----------------------------------------------|-------------------------|---------------------------|-------------------------------------------------------------------|----------------------------|------------------------------------------------------------------------------------------------------------------------------------------------------------------------------------------------------------------------------------------------------------------------------|
| Adane A, 2016 (60)  | Prospective cohort<br>N = 3,111<br>Australia | Reproductive-aged women | Pre- and inter-conception | - Weight change                                                   | Gestational diabetes       | Small (1.5-2.5% annual weight change), moderate (2.5-5%) and high (>5%) weight gain prior to pregnancy were associated with higher risk of gestational diabetes (independent of baseline BMI)<br>Weight loss was not associated with gestational diabetes risk (low numbers) |
| Hure A, 2017 (61)   | Prospective cohort<br>N = 5,275<br>Australia | Reproductive-aged women | Preconception             | - Maternal age, BMI, height, lifestyle, anxiety, health insurance | Caesarean delivery         | Higher maternal age, overweight and obesity and short stature were associated with higher risk of both emergency and elective caesarean delivery; diagnosis of anxiety and private health insurance were associated with higher risk of elective caesarean delivery          |
| Honein M, 2013 (62) | Simulation<br>USA                            | Reproductive-aged women | Preconception             | - Obesity                                                         | Fetal death, birth defects | Reports on the number of fetal deaths and infants born with birth defects that would be prevented if interventions would be successful in eliminating or reducing (10%) rates of obesity                                                                                     |

| Reference               | Study design                   | Population              | Period                          | Exposure(s)                        | Outcome(s)                                              | Finding(s)                                                                                                                                                                                                                                                                                                                       |
|-------------------------|--------------------------------|-------------------------|---------------------------------|------------------------------------|---------------------------------------------------------|----------------------------------------------------------------------------------------------------------------------------------------------------------------------------------------------------------------------------------------------------------------------------------------------------------------------------------|
| Kim S, 2013 (63)        | Cohort<br>N = 1,228,265<br>USA | Reproductive-aged women | Preconception (retrospectively) | - Overweight and obesity           | Gestational diabetes                                    | Preconception overweight and obesity contribute to gestational diabetes in all ethnic groups but magnitude of percentage gestational diabetes attributable to obesity varied for different ethnic groups. Asian ethnic groups had the highest gestational diabetes prevalence, but the lowest percentage attributable to obesity |
| Kachoria R, 2015 (64)   | Cohort<br>N = 244,196<br>USA   | Reproductive-aged women | Preconception (retrospectively) | - BMI                              | Breastfeeding initiation, continuations and exclusivity | Decreasing number of women initiated, continued and breastfed exclusively with increasing BMI<br>Over time (2009 to 2011), breastfeeding initiation and continuation increased for all women; exclusive breastfeeding increased over time for normal weight and overweight women, but decreased for obese women                  |
| Kirkegaard H, 2015 (65) | Cohort<br>N = 1,024<br>USA     | Reproductive-aged women | Preconception (retrospectively) | - Waist circumference (WC) and BMI | Gestational weight gain and breastfeeding behaviour     | Preconception BMI and WC were differently associated with GWG and breastfeeding intension<br>Higher BMI, but lower WC, were associated with higher GWG and never breastfeeding                                                                                                                                                   |

| Reference             | Study design                   | Population                           | Period                          | Exposure(s)              | Outcome(s)                       | Finding(s)                                                                                                                                                                                                                                                                                                                                |
|-----------------------|--------------------------------|--------------------------------------|---------------------------------|--------------------------|----------------------------------|-------------------------------------------------------------------------------------------------------------------------------------------------------------------------------------------------------------------------------------------------------------------------------------------------------------------------------------------|
| Makela J, 2014 (66)   | Cohort<br>N = 848<br>Finland   | Reproductive-aged women (postpartum) | Preconception (retrospectively) | - Overweight and obesity | Breastfeeding and infant feeding | Overweight women had a shorter exclusive breastfeeding time and introduced complementary foods earlier compared with normal weight women<br>Longer duration of exclusive and partial breastfeeding, and later introduction of complementary foods were associated with lower risk of childhood obesity                                    |
| Thompson L, 2013 (67) | Cohort<br>N = 1,161,949<br>USA | Reproductive-aged women              | Preconception (retrospectively) | - BMI                    | Breastfeeding initiation         | Underweight and obese women were less likely to initiate breastfeeding than women with normal BMI, (OR 0.87, 95 % CI 0.85, 0.89 for underweight; OR 0.84, 95 % CI 0.83, 0.85 for obese). The magnitude of these findings did not significantly vary by race, ethnicity or income (indicating interventions are needed in all populations) |

| Reference                  | Study design                   | Population                                | Period                          | Exposure(s) | Outcome(s)                                                           | Finding(s)                                                                                                                                                                                                                                                                                                                                                                 |
|----------------------------|--------------------------------|-------------------------------------------|---------------------------------|-------------|----------------------------------------------------------------------|----------------------------------------------------------------------------------------------------------------------------------------------------------------------------------------------------------------------------------------------------------------------------------------------------------------------------------------------------------------------------|
| Dekker-Nitert M, 2011 (68) | Cohort<br>N = 412<br>Australia | Reproductive-aged women (early pregnancy) | Preconception (retrospectively) | -           | Knowledge regarding the risks of overweight and obesity in pregnancy | >75% of women identified obesity as risk factor for gestational diabetes and hypertension<br>>60% of women identified obesity as risk factor for caesarean delivery<br><50% of women identified obesity as risk factor for adverse neonatal outcomes<br>Education level, but not BMI status, was associated with knowledge of risks of overweight and obesity in pregnancy |

| Reference              | Study design                    | Population              | Period                          | Exposure(s)                                 | Outcome(s)                      | Finding(s)                                                                                                                                                                                                                                                                                                                                                                                                                                                                                                                  |
|------------------------|---------------------------------|-------------------------|---------------------------------|---------------------------------------------|---------------------------------|-----------------------------------------------------------------------------------------------------------------------------------------------------------------------------------------------------------------------------------------------------------------------------------------------------------------------------------------------------------------------------------------------------------------------------------------------------------------------------------------------------------------------------|
| Schummers L, 2015 (69) | Cohort<br>N = 226,958<br>Canada | Reproductive-aged women | Preconception (retrospectively) | - BMI                                       | Maternal and perinatal outcomes | Presents absolute risk of maternal perinatal outcomes according to change in preconception BMI<br>A 10% difference in preconception BMI was associated with clinically meaningful risk differences for pre-eclampsia, gestational diabetes, preterm delivery, macrosomia, and stillbirth<br>Larger differences in preconception BMI (20-30% differences or shifting at least a BMI category) would be necessary to see meaningfully lower risks of caesarean delivery, shoulder dystocia, NICU stay, and neonatal mortality |
| Yachi Y, 2013 (70)     | Cohort<br>N = 624<br>Japan      | Reproductive-aged women | Preconception (retrospectively) | - BMI at age 20 and BMI change since age 20 | Gestational diabetes            | Low BMI at age 20 and larger BMI increase since age 20 were associated with higher gestational diabetes risk                                                                                                                                                                                                                                                                                                                                                                                                                |



*Paternal diet and lifestyle factors*

| Reference              | Study design                       | Population            | Period                        | Exposure(s)                                                                 | Outcome(s)                                                                               | Finding(s)                                                                                                                                                                                              |
|------------------------|------------------------------------|-----------------------|-------------------------------|-----------------------------------------------------------------------------|------------------------------------------------------------------------------------------|---------------------------------------------------------------------------------------------------------------------------------------------------------------------------------------------------------|
| Mutsaerts M, 2012 (71) | Cohort<br>N = 1,924<br>Netherlands | Reproductive-aged men | Preconception (retrospective) | - Age, BMI, smoking, alcohol, vitamin use, working hours, physical activity | Time to pregnancy (from date the couple set out to conceive)                             | No significant associations                                                                                                                                                                             |
| Mutsaerts M, 2014 (72) | Cohort<br>N = 2,264<br>Netherlands | Reproductive-aged men | Preconception (retrospective) | - Age, BMI, smoking, alcohol, working hours, physical activity              | Gestational hypertension, gestational diabetes, preterm birth, small-for-gestational-age | Paternal lifestyle factors were not associated with pregnancy and birth outcomes; Maternal and paternal lifestyle were highly correlated: both partners should be involved in preconception counselling |

## Inter-pregnancy exposures

### Summary of reviews

| Reference             | Study design                                       | Population                              | Period                       | Exposure(s)                               | Outcome(s)                                           | Finding(s)                                                                                                                                                                                                                                    |
|-----------------------|----------------------------------------------------|-----------------------------------------|------------------------------|-------------------------------------------|------------------------------------------------------|-----------------------------------------------------------------------------------------------------------------------------------------------------------------------------------------------------------------------------------------------|
| Adegboye A, 2013 (73) | Systematic review (RCTs)                           | Reproductive-aged women                 | Inter-pregnancy (postpartum) | - Diet and physical activity intervention | Weight                                               | Women in intervention, compared with standard care:<br>- lost more weight:<br>Mean difference: -1.93 kg (-2.96, -0.89), N = 7 studies<br>- were more likely to return to pre-pregnancy weight:<br>Risk ratio 2.00 (1.31, 3.05), N = 3 studies |
| He X, 2015 (74)       | Systematic review (RCTs and observational studies) | Reproductive-aged women                 | Inter-pregnancy              | - Breastfeeding                           | Inter-pregnancy weight loss at 3-6 months postpartum | Breastfeeding compared with formula feeding did not significantly reduce postpartum weight, large heterogeneity between studies depending on study design, breastfeeding duration and confounding factors taken into account                  |
| Neville C, 2014 (75)  | Systematic review (RCTs)                           | Reproductive-aged women (breastfeeding) | Inter-pregnancy              | - Diet and physical activity intervention | Inter-pregnancy weight loss                          | Diet and physical activity interventions may be effective in reducing postpartum weight in breastfeeding women (no meta-analysis)                                                                                                             |

| Reference            | Study design                              | Population                           | Period          | Exposure(s)                   | Outcome(s)                      | Finding(s)                                                                                                                                                                                                                                                                                                      |
|----------------------|-------------------------------------------|--------------------------------------|-----------------|-------------------------------|---------------------------------|-----------------------------------------------------------------------------------------------------------------------------------------------------------------------------------------------------------------------------------------------------------------------------------------------------------------|
| Neville C, 2014 (76) | Systematic review (observational studies) | Reproductive-aged women              | Inter-pregnancy | - Breastfeeding               | Inter-pregnancy weight loss     | Insufficient evidence to suggest an association between breastfeeding and postpartum weight loss. Study findings varied depending on the time at which the postpartum measurements were carried out, duration and intensity of breastfeeding<br>Few studies rated as high quality showed a positive association |
| Hadar E, 2015 (77)   | Review (observational studies)            | Reproductive-aged women with obesity | Inter-pregnancy | - Inter-pregnancy weight loss | Maternal and perinatal outcomes | Evidence suggests a risk reduction for large-for-gestational-age, pre-eclampsia, gestational diabetes, gestational hypertension                                                                                                                                                                                 |

**Summary of original research studies**

| Reference                | Study design                    | Population              | Period          | Exposure(s)                                | Outcome(s)                           | Finding(s)                                                                                                                                                                                                                                                                                     |
|--------------------------|---------------------------------|-------------------------|-----------------|--------------------------------------------|--------------------------------------|------------------------------------------------------------------------------------------------------------------------------------------------------------------------------------------------------------------------------------------------------------------------------------------------|
| Perni U, 2012 (78)       | Cohort<br>N = 371,627<br>Sweden | Reproductive-aged women | Inter-pregnancy | - Inter-pregnancy change in smoking habits | Pre-eclampsia                        | Compared with women who did not smoke in either pregnancy, risk of preeclampsia was reduced in women who smoked in both pregnancies, in those who only smoked in second pregnancy and, to a lesser extent, in women who smoked only in the first pregnancy                                     |
| Bogaerts A, 2013 (79)    | Cohort<br>N = 7,897<br>Belgium  | Reproductive-aged women | Inter-pregnancy | - Inter-pregnancy weight change            | Maternal and perinatal complications | Weight retention between first and second pregnancy was associated with increased risk of gestational diabetes, gestational hypertension and caesarean delivery<br>Among normal weight women, inter-pregnancy weight loss decreased risk of macrosomia, but increased risk of low birth weight |
| Cnattingius S, 2016 (80) | Cohort<br>N = 456,711<br>Sweden | Reproductive-aged women | Inter-pregnancy | - Inter-pregnancy weight change            | Stillbirth and infant mortality      | Women who gained weight between pregnancies had increased risk of stillbirth and infant mortality<br>In overweight women, weight loss between pregnancies reduced risk of infant mortality                                                                                                     |

| Reference             | Study design                 | Population                                         | Period          | Exposure(s)                     | Outcome(s)                 | Finding(s)                                                                                                                                                                                                                                                                          |
|-----------------------|------------------------------|----------------------------------------------------|-----------------|---------------------------------|----------------------------|-------------------------------------------------------------------------------------------------------------------------------------------------------------------------------------------------------------------------------------------------------------------------------------|
| Jain A, 2013 (81)     | Cohort<br>N = 10,444<br>USA  | Reproductive-aged women (obese)                    | Inter-pregnancy | - Inter-pregnancy weight change | Birthweight                | Inter-pregnancy weight loss of >2 BMI units was associated with lower risk of large-for-gestational-age infant<br>Inter-pregnancy weight gain of >2 BMI units was associated with higher risk of large-for-gestational-age infant<br>No associations with small-for-gestational-age |
| Mostello D, 2010 (82) | Cohort<br>N = 17,773<br>USA  | Reproductive-aged women (history of pre-eclampsia) | Inter-pregnancy | - Inter-pregnancy weight change | Recurrent pre-eclampsia    | Decrease in BMI between pregnancies was associated with lower risk of recurrent pre-eclampsia, increase in BMI with higher risk of recurrent pre-eclampsia<br>Dose-response observed: linear increase in pre-eclampsia risk with increasing inter-pregnancy BMI                     |
| Getahun D, 2007 (83)  | Cohort<br>N = 136,884<br>USA | Reproductive-aged women                            | Inter-pregnancy | - Inter-pregnancy weight change | Incidence of pre-eclampsia | Change in BMI category between pregnancies was associated with increased risk of pre-eclampsia                                                                                                                                                                                      |

| Reference             | Study design                    | Population                      | Period          | Exposure(s)                     | Outcome(s)                      | Finding(s)                                                                                                                                                                                                                                                                                                                                          |
|-----------------------|---------------------------------|---------------------------------|-----------------|---------------------------------|---------------------------------|-----------------------------------------------------------------------------------------------------------------------------------------------------------------------------------------------------------------------------------------------------------------------------------------------------------------------------------------------------|
| Villamor E, 2006 (84) | Cohort<br>N = 151,025<br>Sweden | Reproductive-aged women         | Inter-pregnancy | - Inter-pregnancy weight change | Maternal and perinatal outcomes | BMI loss >1 unit: lower risk of pre-eclampsia and large-for-gestational-age<br>BMI increase: higher risk of pre-eclampsia, gestational hypertension, gestational diabetes, caesarean delivery, stillbirth and large-for-gestational-age<br>Also among women remaining in the normal weight category<br>No increased risks for decrease in BMI units |
| Glazer N, 2004 (85)   | Cohort<br>N = 4,102<br>USA      | Reproductive-aged women (obese) | Inter-pregnancy | - Inter-pregnancy weight change | Gestational diabetes            | 32% of women lost weight between pregnancies<br>Weight loss more than 10 pounds (~4 kg) was associated with lower risk of gestational diabetes (OR 0.63, 95% CI 0.38, 1.02)<br>61% gained weight between pregnancies<br>Weight gain more than 4 kg was associated with higher risk of gestational diabetes (OR 1.47, 95% CI 1.05, 2.04)             |
| Whiteman V, 2011 (86) | Cohort<br>N = 232,272<br>USA    | Reproductive-aged women         | Inter-pregnancy | - Inter-pregnancy weight change | Gestational diabetes            | Increase in BMI category between pregnancies increased risk of gestational diabetes<br>Decrease in BMI category was associated with lower risk of gestational diabetes                                                                                                                                                                              |

| Reference             | Study design                 | Population              | Period          | Exposure(s)                     | Outcome(s)         | Finding(s)                                                                                                                                                                  |
|-----------------------|------------------------------|-------------------------|-----------------|---------------------------------|--------------------|-----------------------------------------------------------------------------------------------------------------------------------------------------------------------------|
| Whiteman V, 2011 (87) | Cohort<br>N = 218,389<br>USA | Reproductive-aged women | Inter-pregnancy | - Inter-pregnancy weight change | Stillbirth         | Increase in BMI category between pregnancies moderately increased risk of stillbirth<br>Decrease in BMI category was not associated with risk of stillbirth                 |
| Whiteman V, 2011 (88) | Cohort<br>N = 100,828<br>USA | Reproductive-aged women | Inter-pregnancy | - Inter-pregnancy weight change | Caesarean delivery | Increase in BMI category between pregnancies moderately increased risk of caesarean delivery<br>Decrease in BMI category was not associated with risk of caesarean delivery |

## References

1. Case AP, Hoyt AT, Canfield MA, Wilkinson AV. Periconceptional risk factors for birth defects among younger and older teen mothers. *J Pediatr Adolesc Gynecol*. 2015;28(4):263-70.
2. Caspers Conway KM, Romitti PA, Holmes L, Olney RS, Richardson SD. Maternal periconceptional alcohol consumption and congenital limb deficiencies. *Birth Defects Res A Clin Mol Teratol*. 2014;100(11):863-76.
3. Caspers KM, Romitti PA, Lin S, Olney RS, Holmes LB, Werler MM. Maternal periconceptional exposure to cigarette smoking and congenital limb deficiencies. *Paediatr Perinat Epidemiol*. 2013;27(6):509-20.
4. Chan F, Koren G. Is periconceptional opioid use safe? *Can Fam Physician*. 2015;61(5):431-3.
5. Deng K, Liu Z, Lin Y, Mu D, Chen X, Li J, et al. Periconceptional paternal smoking and the risk of congenital heart defects: a case-control study. *Birth Defects Res A Clin Mol Teratol*. 2013;97(4):210-6.
6. Makelarski JA, Romitti PA, Sun L, Burns TL, Druschel CM, Suarez L, et al. Periconceptional maternal alcohol consumption and neural tube defects. *Birth Defects Res A Clin Mol Teratol*. 2013;97(3):152-60.
7. Zhu Y, Romitti PA, Caspers Conway KM, Shen DH, Sun L, Browne ML, et al. Maternal periconceptional alcohol consumption and congenital heart defects. *Birth Defects Res A Clin Mol Teratol*. 2015;103(7):617-29.
8. Matusiak K, Barrett HL, Callaway LK, Nitert MD. Periconception weight loss: common sense for mothers, but what about for babies? *J Obes*. 2014;2014:204295.
9. Steegers-Theunissen RP, Twigt J, Pestinger V, Sinclair KD. The periconceptional period, reproduction and long-term health of offspring: the importance of one-carbon metabolism. *Hum Reprod Update*. 2013;19(6):640-55.
10. Dean SV, Lassi ZS, Imam AM, Bhutta ZA. Preconception care: nutritional risks and interventions. *Reprod Health*. 2014;11 Suppl 3:S3.
11. Lassi ZS, Imam AM, Dean SV, Bhutta ZA. Preconception care: caffeine, smoking, alcohol, drugs and other environmental chemical/radiation exposure. *Reprod Health*. 2014;11 Suppl 3:S6.
12. Poston L, Caleyachetty R, Cnattingius S, Corvalan C, Uauy R, Herring S, et al. Preconceptional and maternal obesity: epidemiology and health consequences. *Lancet Diabetes Endocrinol*. 2016;4(12):1025-36.
13. Hanson M, Barker M, Dodd JM, Kumanyika S, Norris S, Steegers E, et al. Interventions to prevent maternal obesity before conception, during pregnancy, and post partum. *Lancet Diabetes Endocrinol*. 2017;5(1):65-76.
14. Temel S, van Voorst SF, Jack BW, Denktas S, Steegers EA. Evidence-based preconceptional lifestyle interventions. *Epidemiol Rev*. 2014;36:19-30.
15. Anderson K, Norman RJ, Middleton P. Preconception lifestyle advice for people with subfertility. *Cochrane Database Syst Rev*. 2010(4):Cd008189.
16. Solmi F, Sallis H, Stahl D, Treasure J, Micali N. Low birth weight in the offspring of women with anorexia nervosa. *Epidemiol Rev*. 2014;36:49-56.
17. De-Regil LM, Pena-Rosas JP, Fernandez-Gaxiola AC, Rayco-Solon P. Effects and safety of periconceptional oral folate supplementation for preventing birth defects. *Cochrane Database Syst Rev*. 2015(12):Cd007950.
18. Ramakrishnan U, Grant F, Goldenberg T, Zongrone A, Martorell R. Effect of women's nutrition before and during early pregnancy on maternal and infant outcomes: a systematic review. *Paediatr Perinat Epidemiol*. 2012;26 Suppl 1:285-301.



19. Stang J, Huffman LG. Position of the Academy of Nutrition and Dietetics: obesity, reproduction, and pregnancy outcomes. *J Acad Nutr Diet.* 2016;116(4):677-91.
20. Harrison CL, Brown WJ, Hayman M, Moran LJ, Redman LM. The role of physical activity in preconception, pregnancy and postpartum health. *Semin Reprod Med.* 2016;34(2):e28-37.
21. Tobias DK, Zhang C, van Dam RM, Bowers K, Hu FB. Physical activity before and during pregnancy and risk of gestational diabetes mellitus: a meta-analysis. *Diabetes Care.* 2011;34(1):223-9.
22. Campbell JM, Lane M, Owens JA, Bakos HW. Paternal obesity negatively affects male fertility and assisted reproduction outcomes: a systematic review and meta-analysis. *Reprod Biomed Online.* 2015;31(5):593-604.
23. Been JV, Nurmatov UB, Cox B, Nawrot TS, van Schayck CP, Sheikh A. Effect of smoke-free legislation on perinatal and child health: a systematic review and meta-analysis. *Lancet.* 2014;383(9928):1549-60.
24. Aune D, Saugstad OD, Henriksen T, Tonstad S. Maternal body mass index and the risk of fetal death, stillbirth, and infant death: a systematic review and meta-analysis. *JAMA.* 2014;311(15):1536-46.
25. Yi XY, Li QF, Zhang J, Wang ZH. A meta-analysis of maternal and fetal outcomes of pregnancy after bariatric surgery. *Int J Gynaecol Obstet.* 2015;130(1):3-9.
26. Galazis N, Docheva N, Simillis C, Nicolaidis KH. Maternal and neonatal outcomes in women undergoing bariatric surgery: a systematic review and meta-analysis. *Eur J Obstet Gynecol Reprod Biol.* 2014;181:45-53.
27. Tan O, Carr BR. The impact of bariatric surgery on obesity-related infertility and in vitro fertilization outcomes. *Semin Reprod Med.* 2012;30(6):517-28.
28. Nykjaer C, Alwan NA, Greenwood DC, Simpson NA, Hay AW, White KL, et al. Maternal alcohol intake prior to and during pregnancy and risk of adverse birth outcomes: evidence from a British cohort. *J Epidemiol Community Health.* 2014;68(6):542-9.
29. Eagles JM, Lee AJ, Raja EA, Millar HR, Bhattacharya S. Pregnancy outcomes of women with and without a history of anorexia nervosa. *Psychol Med.* 2012;42(12):2651-60.
30. Linna MS, Raevuori A, Haukka J, Suvisaari JM, Suokas JT, Gissler M. Pregnancy, obstetric, and perinatal health outcomes in eating disorders. *Am J Obstet Gynecol.* 2014;211(4):392.e1-8.
31. Micali N, dos-Santos-Silva I, De Stavola B, Steenweg-de Graaff J, Jaddoe V, Hofman A, et al. Fertility treatment, twin births, and unplanned pregnancies in women with eating disorders: findings from a population-based birth cohort. *BJOG.* 2014;121(4):408-16.
32. Pasternak Y, Weintraub AY, Shoham-Vardi I, Sergienko R, Guez J, Wiznitzer A, et al. Obstetric and perinatal outcomes in women with eating disorders. *J Womens Health.* 2012;21(1):61-5.
33. Khodr ZG, Lupo PJ, Agopian AJ, Canfield MA, Case AP, Carmichael SL, et al. Preconceptional folic acid-containing supplement use in the National Birth Defects Prevention Study. *Birth Defects Res A Clin Mol Teratol.* 2014;100(6):472-82.
34. Malek L, Umberger W, Makrides M, Zhou SJ. Poor adherence to folic acid and iodine supplement recommendations in preconception and pregnancy: a cross-sectional analysis. *Aust N Z J Public Health.* 2016;40(5):424-9.

35. Mannien J, de Jonge A, Cornel MC, Spelten E, Hutton EK. Factors associated with not using folic acid supplements preconceptionally. *Public health nutrition*. 2014;17(10):2344-50.
36. Tort J, Lelong N, Prunet C, Khoshnood B, Blondel B. Maternal and health care determinants of preconceptional use of folic acid supplementation in France: results from the 2010 National Perinatal Survey. *BJOG*. 2013;120(13):1661-7.
37. Bao W, Bowers K, Tobias DK, Hu FB, Zhang C. Prepregnancy dietary protein intake, major dietary protein sources, and the risk of gestational diabetes mellitus: a prospective cohort study. *Diabetes Care*. 2013;36(7):2001-8.
38. Bao W, Bowers K, Tobias DK, Olsen SF, Chavarro J, Vaag A, et al. Prepregnancy low-carbohydrate dietary pattern and risk of gestational diabetes mellitus: a prospective cohort study. *Am J Clin Nutr*. 2014;99(6):1378-84.
39. Bao W, Tobias DK, Hu FB, Chavarro JE, Zhang C. Pre-pregnancy potato consumption and risk of gestational diabetes mellitus: prospective cohort study. *BMJ*. 2016;352:h6898.
40. Bao W, Tobias DK, Olsen SF, Zhang C. Pre-pregnancy fried food consumption and the risk of gestational diabetes mellitus: a prospective cohort study. *Diabetologia*. 2014;57(12):2485-91.
41. Bowers K, Tobias DK, Yeung E, Hu FB, Zhang C. A prospective study of prepregnancy dietary fat intake and risk of gestational diabetes. *Am J Clin Nutr*. 2012;95(2):446-53.
42. Chen L, Hu FB, Yeung E, Tobias DK, Willett WC, Zhang C. Prepregnancy consumption of fruits and fruit juices and the risk of gestational diabetes mellitus: a prospective cohort study. *Diabetes Care*. 2012;35(5):1079-82.
43. Gaskins AJ, Rich-Edwards JW, Hauser R, Williams PL, Gillman MW, Penzias A, et al. Prepregnancy dietary patterns and risk of pregnancy loss. *Am J Clin Nutr*. 2014;100(4):1166-72.
44. Tobias DK, Zhang C, Chavarro J, Bowers K, Rich-Edwards J, Rosner B, et al. Prepregnancy adherence to dietary patterns and lower risk of gestational diabetes mellitus. *Am J Clin Nutr*. 2012;96(2):289-95.
45. Zhang C, Schulze MB, Solomon CG, Hu FB. A prospective study of dietary patterns, meat intake and the risk of gestational diabetes mellitus. *Diabetologia*. 2006;49(11):2604-13.
46. Schoenaker DA, Soedamah-Muthu SS, Callaway LK, Mishra GD. Pre-pregnancy dietary patterns and risk of gestational diabetes mellitus: results from an Australian population-based prospective cohort study. *Diabetologia*. 2015;58(12):2726-35.
47. Schoenaker DA, Soedamah-Muthu SS, Callaway LK, Mishra GD. Prepregnancy dietary patterns and risk of developing hypertensive disorders of pregnancy: results from the Australian Longitudinal Study on Women's Health. *Am J Clin Nutr*. 2015;102(1):94-101.
48. Schoenaker DA, Soedamah-Muthu SS, Mishra GD. Quantifying the mediating effect of body mass index on the relation between a Mediterranean diet and development of maternal pregnancy complications: the Australian Longitudinal Study on Women's Health. *Am J Clin Nutr*. 2016;104(3):638-45.
49. Mishra GD, Schoenaker DA, Mihrshahi S, Dobson AJ. How do women's diets compare with the new Australian dietary guidelines? *Public Health Nutr*. 2015;18(2):218-25.
50. Grieger JA, Grzeskowiak LE, Clifton VL. Preconception dietary patterns in human pregnancies are associated with preterm delivery. *J Nutr*. 2014;144(7):1075-80.

51. Hatch EE, Wise LA, Mikkelsen EM, Christensen T, Riis AH, Sorensen HT, et al. Caffeinated beverage and soda consumption and time to pregnancy. *Epidemiology*. 2012;23(3):393-401.
52. Twigt JM, Bolhuis ME, Steegers EA, Hammiche F, van Inzen WG, Laven JS, et al. The preconception diet is associated with the chance of ongoing pregnancy in women undergoing IVF/ICSI treatment. *Hum Reprod*. 2012;27(8):2526-31.
53. Xie Y, Madkour AS, Harville EW. Preconception nutrition, physical activity, and birth outcomes in adolescent girls. *J Pediatr Adolesc Gynecol*. 2015;28(6):471-6.
54. Hauff LE, Leonard SA, Rasmussen KM. Associations of maternal obesity and psychosocial factors with breastfeeding intention, initiation, and duration. *Am J Clin Nutr*. 2014;99(3):524-34. Epub 2014/01/10.
55. Krogsgaard S, Gudmundsdottir SL, Nilsen TI. Prepregnancy physical activity in relation to offspring birth weight: a prospective population-based study in Norway-The HUNT Study. *J Pregnancy*. 2013;2013:780180.
56. Been JV, Mackay DF, Millett C, Pell JP, van Schayck OC, Sheikh A. Impact of smoke-free legislation on perinatal and infant mortality: a national quasi-experimental study. *Sci Rep*. 2015;5:13020.
57. Cox B, Martens E, Nemery B, Vangronsveld J, Nawrot TS. Impact of a stepwise introduction of smoke-free legislation on the rate of preterm births: analysis of routinely collected birth data. *BMJ*. 2013;346:f441.
58. McKinnon B, Auger N, Kaufman JS. The impact of smoke-free legislation on educational differences in birth outcomes. *J Epidemiol Community Health*. 2015;69(10):937-43.
59. Suzuki K, Sato M, Zheng W, Shinohara R, Yokomichi H, Yamagata Z. Effect of maternal smoking cessation before and during early pregnancy on fetal and childhood growth. *J Epidemiol*. 2014;24(1):60-6.
60. Adane AA, Tooth LR, Mishra GD. Pre-pregnancy weight change and incidence of gestational diabetes mellitus: a finding from a prospective cohort study. *Diabetes Res Clin Pract*. 2017;124:72-80
61. Hure A, Powers J, Chojenta C, Loxton D. Rates and predictors of caesarean section for first and second births: A prospective cohort of Australian women. *Matern Child Health J*. 2017;21(5):1175-84.
62. Honein MA, Devine O, Sharma AJ, Rasmussen SA, Park S, Kucik JE, et al. Modeling the potential public health impact of prepregnancy obesity on adverse fetal and infant outcomes. *Obesity*. 2013;21(6):1276-83.
63. Kim SY, Saraiva C, Curtis M, Wilson HG, Troyan J, Sharma AJ. Fraction of gestational diabetes mellitus attributable to overweight and obesity by race/ethnicity, California, 2007-2009. *Am J Public Health*. 2013;103(10):e65-72.
64. Kachoria R, Moreland JJ, Cordero L, Oza-Frank R. Trends in breastfeeding initiation, continuation, and exclusivity by maternal prepregnancy weight: 2004-2011. *Obesity*. 2015;23(9):1895-902.
65. Kirkegaard H, Nohr EA, Rasmussen KM, Stovring H, Sorensen TI, Lewis CE, et al. Maternal prepregnancy waist circumference and BMI in relation to gestational weight gain and breastfeeding behavior: the CARDIA study. *Am J Clin Nutr*. 2015;102(2):393-401.
66. Makela J, Vaarno J, Kaljonen A, Niinikoski H, Lagstrom H. Maternal overweight impacts infant feeding patterns-the STEPS Study. *Eur J Clin Nutr*. 2014;68(1):43-9.

67. Thompson LA, Zhang S, Black E, Das R, Ryngaert M, Sullivan S, et al. The association of maternal pre-pregnancy body mass index with breastfeeding initiation. *Matern Child Health J.* 2013;17(10):1842-51.
68. Nitert MD, Foxcroft KF, Lust K, Fagermo N, Lawlor DA, O'Callaghan M, et al. Overweight and obesity knowledge prior to pregnancy: a survey study. *BMC Pregnancy Childbirth.* 2011;11:96.
69. Schummers L, Hutcheon JA, Bodnar LM, Lieberman E, Himes KP. Risk of adverse pregnancy outcomes by prepregnancy body mass index: a population-based study to inform prepregnancy weight loss counseling. *Obstet Gynecol.* 2015;125(1):133-43.
70. Yachi Y, Tanaka Y, Nishibata I, Sugawara A, Kodama S, Saito K, et al. Low BMI at age 20 years predicts gestational diabetes independent of BMI in early pregnancy in Japan: Tanaka Women's Clinic Study. *Diabet Med.* 2013;30(1):70-3.
71. Mutsaerts MA, Groen H, Huiting HG, Kuchenbecker WK, Sauer PJ, Land JA, et al. The influence of maternal and paternal factors on time to pregnancy--a Dutch population-based birth-cohort study: the GECKO Drenthe study. *Hum Reprod.* 2012;27(2):583-93.
72. Mutsaerts MA, Groen H, Buitter-Van der Meer A, Sijtsma A, Sauer PJ, Land JA, et al. Effects of paternal and maternal lifestyle factors on pregnancy complications and perinatal outcome. A population-based birth-cohort study: the GECKO Drenthe cohort. *Hum Reprod.* 2014;29(4):824-34.
73. Amorim Adegboye AR, Linne YM. Diet or exercise, or both, for weight reduction in women after childbirth. *Cochrane Database Syst Rev.* 2013(7):Cd005627.
74. He X, Zhu M, Hu C, Tao X, Li Y, Wang Q, et al. Breast-feeding and postpartum weight retention: a systematic review and meta-analysis. *Public Health Nutr.* 2015;18(18):3308-16.
75. Neville CE, McKinley MC, Holmes VA, Spence D, Woodside JV. The effectiveness of weight management interventions in breastfeeding women-a systematic review and critical evaluation. *Birth.* 2014;41(3):223-36.
76. Neville CE, McKinley MC, Holmes VA, Spence D, Woodside JV. The relationship between breastfeeding and postpartum weight change-a systematic review and critical evaluation. *Int J Obes.* 2014;38(4):577-90.
77. Hadar E, Ashwal E, Hod M. The preconceptional period as an opportunity for prediction and prevention of noncommunicable disease. *Best Pract Res Clin Obstet Gynaecol.* 2015;29(1):54-62.
78. Perni UC, Wikstrom AK, Cnattingius S, Villamor E. Interpregnancy change in smoking habits and risk of preeclampsia: a population-based study. *Am J Hypertens.* 2012;25(3):372-8.
79. Bogaerts A, Van den Bergh BR, Ameye L, Witters I, Martens E, Timmerman D, et al. Interpregnancy weight change and risk for adverse perinatal outcome. *Obstet Gynecol.* 2013;122(5):999-1009.
80. Cnattingius S, Villamor E. Weight change between successive pregnancies and risks of stillbirth and infant mortality: a nationwide cohort study. *Lancet.* 2016;387(10018):558-65.
81. Jain AP, Gavard JA, Rice JJ, Catanzaro RB, Artal R, Hopkins SA. The impact of interpregnancy weight change on birthweight in obese women. *Am J Obstet Gynecol.* 2013;208(3):205.e1-7.
82. Mostello D, Jen Chang J, Allen J, Luehr L, Shyken J, Leet T. Recurrent preeclampsia: the effect of weight change between pregnancies. *Obstet Gynecol.* 2010;116(3):667-72.

83. Getahun D, Ananth CV, Oyelese Y, Chavez MR, Kirby RS, Smulian JC. Primary preeclampsia in the second pregnancy: effects of changes in prepregnancy body mass index between pregnancies. *Obstet Gynecol.* 2007;110(6):1319-25.
84. Villamor E, Cnattingius S. Interpregnancy weight change and risk of adverse pregnancy outcomes: a population-based study. *Lancet.* 2006;368(9542):1164-70.
85. Glazer NL, Hendrickson AF, Schellenbaum GD, Mueller BA. Weight change and the risk of gestational diabetes in obese women. *Epidemiology.* 2004;15(6):733-7.
86. Whiteman VE, Aliyu MH, August EM, McIntosh C, Duan J, Alio AP, et al. Changes in prepregnancy body mass index between pregnancies and risk of gestational and type 2 diabetes. *Arch Gynecol Obstet.* 2011;284(1):235-40.
87. Whiteman VE, Crisan L, McIntosh C, Alio AP, Duan J, Marty PJ, et al. Interpregnancy body mass index changes and risk of stillbirth. *Gynecol Obstet Invest.* 2011;72(3):192-5.
88. Whiteman VE, McIntosh C, Rao K, Mbah AK, Salihu HM. Interpregnancy BMI change and risk of primary caesarean delivery. *J Obstet Gynaecol.* 2011;31(7):589-93.

## **Appendix 2. Overview of behaviour change interventions in pregnancy with a dietary component.**

### **Background to overview of systematic reviews**

Systematic reviews aim to support evidence-based decision making due to the ever increasing, often unmanageable volume of healthcare research published. However, the volume of systematic reviews being published (approximately 11/day) compounds the problem already faced by decision makers (JBI 2014). An overview of existing systematic reviews (also known as an umbrella review or systematic review of systematic reviews) can compare and contrast published reviews and is an ideal way to highlight if the evidence base is consistent or contradictory. As systematic reviews will have some degree of overlap in their included studies, a meta-analysis to pool summary estimates across systematic reviews is not appropriate. The evidence-synthesis should instead compare results between individual systematic reviews to explore consistency in findings when the same research question is investigated by different groups of researchers.

### **Summary of overview methods**

The review aimed to identify relevant international systematic review evidence on the effectiveness of dietary behaviour change changes interventions in pregnancy, published in peer-reviewed journals or as grey literature. Systematic reviews reporting either a meta-analyses or narrative syntheses were included if published between January 2005 to the date of the searches (January 2016), and in English language. An adapted PICOS framework was used to develop search terms. As we expected to find reviews with multiple Comparator groups (e.g. based on BMI categories) and were not restricting the review to specific behavioural or pregnancy outcomes, the adapted PIS was used to define the Population (pregnancy), Intervention (weight management or diet or obesity), and Study design (systematic review). The databases searched included systematic review repositories (The Cochrane Library: including Cochrane Database of Systematic Reviews, The Database of Abstracts of Reviews of Effectiveness (DARE), Joanna Briggs Institute (JBI) Database of Systematic Reviews and Implementation Reports, PROSPERO), electronic databases (Medline, EMBASE, CINAHL, Maternity and Infant Care, PsycINFO), and grey literature sources (Google Scholar, NICE Evidence Search (<http://www.evidence.nhs.uk>), National Institute for Health Research Journals library, Health Technology Assessment Database). Results were imported into Endnote for title and abstract screening. Narrative and meta-analyses results reported in the included systematic reviews are presented in tables and forest plots. Data are presented in the table of included studies for the effect of interventions on explicit dietary behaviour change during pregnancy. The figures (in the manuscript and web appendices) present the meta-analyses for the effect of dietary interventions on gestational weight gain and the most relevant clinical outcomes which impact on offspring health (gestational diabetes, preterm birth, preeclampsia and large for gestational age).

Reference: Joanna Briggs Institute (2014) Reviewers' Manual: Methodology for JBI Umbrella Reviews. [www.joannabriggs.org](http://www.joannabriggs.org) [accessed 06/11/2017]

**Table: Characteristics of systematic reviews of behaviour change interventions in pregnancy with a dietary component**

| Systematic review author, year | Type of intervention | Intervention targeted by maternal weight | Behaviour outcomes reported* | Evidence synthesis methods | Number of included studies | Sample size of pooled data | Publication date range of included studies | Country economy of included studies <sup>#</sup> | Results: Maternal dietary behaviours                                                                               |
|--------------------------------|----------------------|------------------------------------------|------------------------------|----------------------------|----------------------------|----------------------------|--------------------------------------------|--------------------------------------------------|--------------------------------------------------------------------------------------------------------------------|
| Agha et al 2014                | Diet +/- PA          | Any weight                               | proxy                        | Meta-analysis              | 14                         | 2,734                      | 1998-2008                                  | High n=14                                        | Not reported                                                                                                       |
| Campbell et al 2011            | Diet +/- PA          | Any weight                               | proxy                        | Meta-analysis              | 5                          | 390                        | 2002-2010                                  | High n=5                                         | Not reported                                                                                                       |
| Dodd et al 2008                | Diet +/- PA          | Overweight and obese                     | proxy                        | Narrative                  | 2                          | 174                        | 2000-2002                                  | High n=2                                         | Not reported                                                                                                       |
| Dodd et al 2010                | Diet +/- PA          | Overweight and obese                     | proxy                        | Meta-analysis              | 9                          | 743                        | 1992-2008                                  | Upper-middle n=1<br>High n=8                     | Not reported                                                                                                       |
| Furber et al 2013              | Diet +/- PA          | Obese                                    | proxy                        | Narrative                  | 0                          | 0                          | n/a                                        | n/a                                              | Not reported                                                                                                       |
| Gardner et al 2011             | Diet +/- PA          | Any weight                               | proxy + explicit             | Meta-analysis              | 10                         | 1,656                      | 2000-2010                                  | High n=10                                        | Diet behaviour significantly improved (n=1 study), no significant difference (n=5 studies)                         |
| Hill et al 2013                | Diet +/- PA          | Any weight                               | proxy                        | Meta-analysis              | 22                         | 3,823                      | 2002-2012                                  | Upper-middle n=2<br>High n=20                    | Not reported                                                                                                       |
| Kuhlmann et al 2008            | Diet +/- PA          | Any weight                               | proxy                        | Narrative                  | 1                          | 120                        | 2002                                       | High n=1                                         | Not reported                                                                                                       |
| Liu et al 2005                 | Diet +/- PA          | Any weight                               | proxy                        | Narrative                  | 3                          | 706                        | 1995-2004                                  | High n=3                                         | Not reported                                                                                                       |
| Muktabhant et al 2015          | Diet +/- PA          | Any weight                               | proxy + explicit             | Meta-analysis              | 44                         | 11,444                     | 1990-2014                                  | Upper-middle n=1<br>High n=43                    | Weighted mean difference (95% CI):<br>Energy intake (KJ) -570.77 (-894.28, -247.26)<br>Fibre (g) 1.53 (0.94, 2.12) |
| Olander et al 2015             | Diet +/- PA          | Obese                                    | proxy                        | Narrative                  | 10                         | N/S                        | 2008-2014                                  | High n=10                                        | Not reported                                                                                                       |
| Oteng-Ntim et al 2012          | Diet +/- PA          | Overweight and obese                     | proxy                        | Meta-analysis              | 19                         | 3,619                      | 2002-2011                                  | Upper-middle n=1<br>High n=18                    | Not reported                                                                                                       |
| Quinlivan et al 2011           | Diet                 | Obese                                    | proxy                        | Meta-analysis              | 4                          | 537                        | 2008-2011                                  | High n=4                                         | Not reported                                                                                                       |

|                           |             |            |                  |               |    |         |           |                               |                                                                                                                                                                                                         |
|---------------------------|-------------|------------|------------------|---------------|----|---------|-----------|-------------------------------|---------------------------------------------------------------------------------------------------------------------------------------------------------------------------------------------------------|
| Ronnberg et al 2010       | Diet +/- PA | Any weight | proxy            | Narrative     | 8  | 1,538   | 2000-2009 | High n=8                      | Not reported                                                                                                                                                                                            |
| SCHARR 2009               | Diet +/- PA | Any weight | proxy + explicit | Meta-analysis | 12 | 1,845   | 1991-2009 | High n=12                     | Significantly increased: protein, fruit & vegetables, high-fibre bread<br>Significantly reduced: total energy intake, fat, carbohydrate<br>No significant difference: diet behaviour, high sugar snacks |
| Skouteris et al 2010      | Diet +/- PA | Any weight | proxy            | Narrative     | 10 | 1,852   | 2000-2010 | High n=10                     | Not reported                                                                                                                                                                                            |
| Streuling et al 2010      | Diet +/- PA | Any weight | proxy            | Meta-analysis | 9  | 1,549   | 2000-2010 | High n=9                      | Not reported                                                                                                                                                                                            |
| Tanentsapf et al 2011     | Diet        | Any weight | proxy            | Meta-analysis | 13 | 1,802   | 1975-2011 | Lower-middle n=1<br>High n=12 | Not reported                                                                                                                                                                                            |
| Thangaratinam et al 2012a | Diet +/- PA | Any weight | proxy            | Meta-analysis | 26 | 5,426   | 1976-2011 | Not reported                  | Not reported                                                                                                                                                                                            |
| Thangaratinam et al 2012b | Diet +/- PA | Any weight | proxy            | Meta-analysis | 88 | 182,139 | 1976-2010 | Not reported                  | Not reported                                                                                                                                                                                            |

\*Explicit outcomes following dietary behaviour change intervention are the reported dietary behaviours (e.g. energy intake, fibre consumption). Proxy outcomes are maternal or infant health outcomes (e.g. gestational diabetes, preterm birth) or weight outcomes (e.g. gestational weight gain, birthweight) rather than the explicit dietary behaviour change.

# World Bank list of economies: low-income economies, lower-middle-income economies, upper-middle-income economies, and high-income economies. High-income study populations were from Australia, Belgium, Canada, Denmark, Finland, Germany, Ireland, Italy, Netherlands, Norway, Spain, Sweden, Taiwan, UK and USA. Upper-middle-income populations were from Brazil. Lower-middle-income populations were from Egypt.

Abbreviations: PA – physical activity, CI – confidence interval, KJ – kilojoules, g – grams

#### References for the included reviews:

- Agha M, Agha RA, Sandall J. Interventions to reduce and prevent obesity in pre-conceptual and pregnant women: a systematic review and meta-analysis. PLoS One. 2014 May 14;9(5):e95132
- Campbell F, Johnson M, Messina J, Guillaume L, Goyder E. Behavioural interventions for weight management in pregnancy: a systematic review of quantitative and qualitative data. BMC Public Health. 2011 Jun 22;11:491.



- Dodd JM, Crowther CA, Robinson JS. Dietary and lifestyle interventions to limit weight gain during pregnancy for obese or overweight women: a systematic review. *Acta Obstet Gynecol Scand*. 2008;87(7):702-6
- Dodd J, Grivell R, Crowther C, Robinson J. Antenatal interventions for overweight or obese pregnant women: a systematic review of randomised trials. *BJOG* 2010;117:1316–1326.
- Furber CM, McGowan L, Bower P, Kontopantelis E, Quenby S, Lavender T. Antenatal interventions for reducing weight in obese women for improving pregnancy outcome. *Cochrane Database of Systematic Reviews* 2013, Issue 1. Art. No.: CD009334. DOI:10.1002/14651858.CD009334.pub2.
- Gardner et al Changing diet and physical activity to reduce gestational weight gain: a meta-analysis. *obesity reviews* (2011) 12, e602–e620
- Hill et al Interventions designed to limit gestational weight gain: a systematic review of theory and meta-analysis of intervention components. *obesity reviews* (2013) 14, 435–450
- Kuhlmann et al. Weight-Management Interventions for Pregnant or Postpartum Women. *Am J Prev Med* 2008;34(6):523–528
- Liu L, Mirza M, Thomas H. Effectiveness of Interventions to Prevent Excessive Weight Gain During Pregnancy. *Effective Public Health Practice Project (EPHPP)*. December 2005. Public Health, Research, Education and Development Programme: Hamilton, Canada
- Muktabhant B, Lawrie TA, Lumbiganon P, Laopaiboon M. Diet or exercise, or both, for preventing excessive weight gain in pregnancy. *Cochrane Database of Systematic Reviews* 2015, Issue 6. Art. No.: CD007145. DOI: 10.1002/14651858.CD007145.pub3.
- Olander et al. Person-centred care in interventions to limit weight gain in pregnant women with obesity - a systematic review. *BMC Pregnancy and Childbirth* (2015) 15:50
- Oteng-Ntim et al. Lifestyle interventions for overweight and obese pregnant women to improve pregnancy outcome: systematic review and meta-analysis . *BMC Medicine* 2012, 10:47
- Quinlivan JA, Julania S, Lam L. Antenatal dietary interventions in obese pregnant women to restrict gestational weight gain to Institute of Medicine recommendations: a meta-analysis. *Obstet Gynecol*. 2011 Dec;118(6):1395-401
- Ronnberg AK, Nilsson K. Interventions during pregnancy to reduce excessive gestational weight gain: a systematic review assessing current clinical evidence using the Grading of Recommendations, Assessment, Development and Evaluation (GRADE) system. *BJOG*. 2010 Oct;117(11):1327-34.
- ScHARR Public Health Collaborating Centre. Systematic review of dietary and/or physical activity interventions for weight management in pregnancy (Commissioned by: NICE Centre for Public Health Excellence). 2009 [https://www.sheffield.ac.uk/polopoly\\_fs/1.43293!/file/Weight-5\\_1.pdf](https://www.sheffield.ac.uk/polopoly_fs/1.43293!/file/Weight-5_1.pdf)
- Skouteris et al. Preventing excessive gestational weight gain: a systematic review of interventions. *obesity reviews* (2010) 11, 757–768
- Streuling et al. Can gestational weight gain be modified by increasing physical activity and diet counseling? A meta-analysis of interventional trials. *Am J Clin Nutr* 2010;92:678–87
- Tanentsapf et al. Systematic review of clinical trials on dietary interventions to prevent excessive weight gain during pregnancy among normal weight, overweight and obese women. *BMC Pregnancy and Childbirth* 2011, 11:81
- Thangaratinam et al Effects of interventions in pregnancy on maternal weight and obstetric outcomes: meta-analysis of randomised evidence. *BMJ* 2012;344:e2088

- Thangaratinam S, Rogozińska E, Jolly K, et al. Interventions to Reduce or Prevent Obesity in Pregnant Women: A Systematic Review. Health Technology Assessment, No. 16.31. Southampton (UK): NIHR Journals Library; 2012 July

**Intervention effects on Large-for-Gestational-Age births**

**High Birthweight**

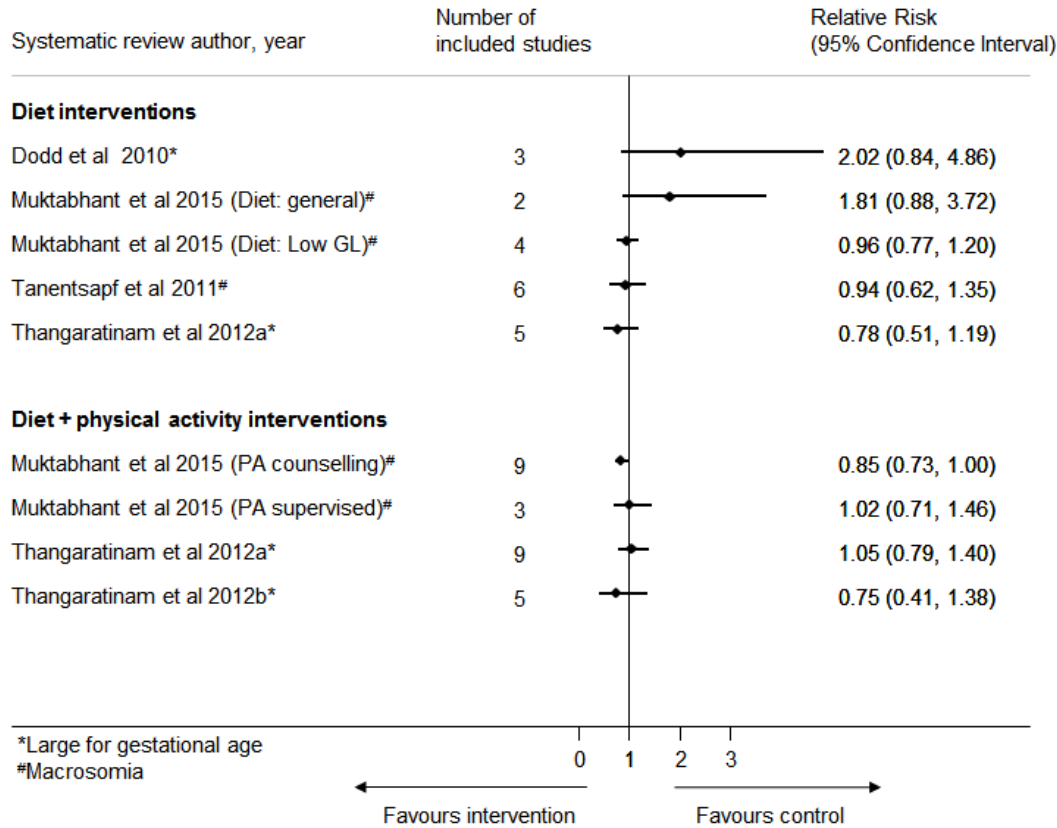

Supplement: NIHMS78604-supplement-Web_Appendix.pdf [file NIHMS78604-supplement-Web_Appendix.pdf]
